# Supplementary material for: Features Associated with Visible Lamina Cribrosa Pores in Individuals of African Ancestry with Glaucoma: Primary Open-Angle African Ancestry Glaucoma Genetics (POAAGG) Study
Source: MDPI journal article supplement (doi:10.3390/vision8020024), 2024-04-18
Supplement: s1 [file s1]

# Supplementary Materials: Features Associated with Visible Lamina Cribrosa Pores in Individuals of African Ancestry with Glaucoma: Primary Open-Angle African Ancestry Glaucoma Genetics (POAAGG) study

Supplemental Table S1. Univariable Analysis for association of genetic variants and visible pores in the Lamina Cribrosa among POAAGG glaucoma cases (N=1966 eyes)

| Variants       | Allele Frequencies | Without LCP | With LCP   | OR (95% CI)       | P-value |
|----------------|--------------------|-------------|------------|-------------------|---------|
| rs1666698_ALT  | 0                  | 31 (36%)    | 55 (64%)   | Ref               | -       |
|                | 1                  | 223 (28%)   | 570 (72%)  | 1.44 (0.90, 2.30) | 0.13    |
|                | 2                  | 302 (28%)   | 785 (72%)  | 1.47 (0.92, 2.32) | 0.10    |
| rs11824032_ALT | 0                  | 307 (28%)   | 799 (72%)  | Ref               | -       |
|                | 1                  | 220 (29%)   | 536 (71%)  | 0.94 (0.77, 1.14) | 0.52    |
|                | 2                  | 29 (28%)    | 75 (72%)   | 0.99 (0.64, 1.54) | 0.98    |
| rs34957764_ALT | 0                  | 500 (28%)   | 1292 (72%) | Ref               | -       |
|                | 1                  | 56 (32%)    | 118 (68%)  | 0.82 (0.58, 1.14) | 0.23    |
|                | 2                  | 0           | 0          | -                 | -       |
